# Supplementary material for: WITHDRAWN: Fluid bearing identification in carbonate reservoir rocks using resistivity logs and dynamic data
Source: Research Square preprint supplement (doi:10.21203/rs.3.rs-7347996/v1), 2025-10-22
Supplement: Supplementary file 1 [file 63d765766fd90abe73a8afc9.docx]

Table (2): Statical data obtained from the resistivity logs throughout tested intervals.

| Well | DST | LLD reading (Ω.m) | | | |
| --- | --- | --- | --- | --- | --- |
| Minimum | Maximum | Mean | Standard deviation |
| BR-1 | 1 | 23.72 | 1574.02 | 163.23 | 3.10 |
| 2 | 2.40 | 61.14 | 19.77 | 1.86 |
| 3 | 8.39 | 3641.36 | 96.91 | 3.21 |
| TT-05 | 1 | 125.16 | 8187.80 | 876.25 | 2.26 |
| MW-2 | 11 | 20.99 | 1686.38 | 298.97 | 2.36 |
| 12 | 6.21 | 1198.96 | 34.93 | 3.02 |
| Ja-46 | 3 | 226.42 | 2377.24 | 714.33 | 1.87 |
| 9.21 | 321.34 | 50.61 | 2.33 |
