# Supplementary material for: WITHDRAWN: Fluid bearing identification in carbonate reservoir rocks using resistivity logs and dynamic data
Source: Research Square preprint supplement (doi:10.21203/rs.3.rs-7347996/v1), 2025-10-22
Supplement: Supplementary file 2 [file 87c0ca1f47783cbb894ab8fd.docx]

Table (1): Drilling stem test information of the studied wells.

| Well | Drilled interval (m) | DST | Test interval(m) | Formation | Fluid type |
| --- | --- | --- | --- | --- | --- |
| BR-1 | 917-977 | 1 | 922-956 | Bekhme | Water |
| 865-917 | 2 | 876-909 | Shiranish |
| 997-1110 | 3 | 998-1042 | Upper Qamchuqa |
| TT-05 | 1988-2070.60 | 1 | 2003-2052 | Basal dolomite | Oil |
| MW-2 | 1246-2192 | 11 | 2127-2197 | Sarmord/Balambo | Tight gas |
| 12 | 1884-2062 |
| Ja-46 | 2690-2802 | 3 | 2725-2840 | Upper Qamchuqa | Gas |
